# Supplementary material for: The complement C3-complement factor D-C3a receptor signalling axis regulates cardiac remodelling in right ventricular failure
Source: PubMed Central journal article supplement (PMC9478115; doi:10.1038/s41467-022-33152-9), 2022-09-15
Supplement: 41467_2022_33152_MOESM1_ESM.pdf [file 41467_2022_33152_MOESM1_ESM.pdf]

## **The complement C3-complement factor D-C3a receptor signalling axis regulates cardiac remodelling in right ventricular failure**

Shogo Ito<sup>1,2</sup>, Hisayuki Hashimoto<sup>1,3</sup>, Hiroyuki Yamakawa<sup>1,3</sup>, Dai Kusumoto<sup>1,3</sup>, Yohei Akiba<sup>1</sup>, Takahiro Nakamura<sup>1</sup>, Mizuki Momoi<sup>1</sup>, Jin Komuro<sup>1</sup>, Toshiomi Katsuki<sup>1</sup>, Mai Kimura<sup>1</sup>, Yoshikazu Kishino<sup>1</sup>, Shin Kashimura<sup>1</sup>, Akira Kunitomi<sup>1</sup>, Mark Lachmann<sup>1</sup>, Masaya Shimojima<sup>1</sup>, Gakuto Yozu<sup>1</sup>, Chikaaki Motoda<sup>1</sup>, Tomohisa Seki<sup>1,4</sup>, Tsunehisa Yamamoto<sup>1</sup>, Yoshiki Shinya<sup>1</sup>, Takahiro Hiraide<sup>1</sup>, Masaharu Kataoka<sup>1,5</sup>, Takashi Kawakami<sup>1</sup>, Kunimichi Suzuki<sup>6</sup>, Kei Ito<sup>7</sup>, Hirotaka Yada<sup>7,8</sup>, Manabu Abe<sup>9</sup>, Mizuko Osaka<sup>10</sup>, Hiromi Tsuru<sup>10</sup>, Masayuki Yoshida<sup>10</sup>, Kenji Sakimura<sup>9</sup>, Yoshihiro Fukumoto<sup>2</sup>, Michisuke Yuzaki<sup>6</sup>, Keiichi Fukuda<sup>1</sup>, Shinsuke Yuasa<sup>1</sup>

<sup>1</sup>Department of Cardiology, Keio University School of Medicine, 35 Shinanomachi, Shinjuku-ku, Tokyo 160-8582, Japan

<sup>2</sup>Division of Cardio-Vascular Medicine, Department of Internal Medicine, Kurume University School of Medicine, 67 Asahi-machi, Kurume, Fukuoka 830-0011, Japan

<sup>3</sup>Center for Preventive Medicine, Keio University School of Medicine, 35 Shinanomachi, Shinjuku-ku, Tokyo 160-8582, Japan

<sup>4</sup>Department of Healthcare Information Management, The University of Tokyo Hospital, 7-3-1 Hongo, Bunkyo-ku, Tokyo 113-8655, Japan

<sup>5</sup>Second Department of Internal Medicine, University of Occupational and Environmental Health, 1-1 Iseigaoka, Yahatanishi-ku, Kitakyushu, Fukuoka 807-8555, Japan

<sup>6</sup>Department of Physiology, Keio University School of Medicine, 35 Shinanomachi, Shinjuku-ku, Tokyo 160-8582, Japan

<sup>7</sup>Department of Cardiology, National Defense Medical College, 3-2 Namiki, Tokorozawa, Saitama 359-8513, Japan

<sup>8</sup>Department of Cardiology, International University of Health and Welfare, Mita Hospital, 1-4-3 Mita Minatoku, Tokyo 108-8329, Japan

<sup>9</sup>Department of Animal Model Development, Brain Research Institute, Niigata University, 1-757 Asahimachi-Dori, Chuo-ku, Niigata 951-8585, Japan

<sup>10</sup>Department of Life Sciences and Bioethics, Graduate School of Medical and Dental Sciences, Tokyo Medical and Dental University, 1-5-45 Yushima, Bunkyo-ku, Tokyo 113-8510, Japan

Supplementary Figure 1

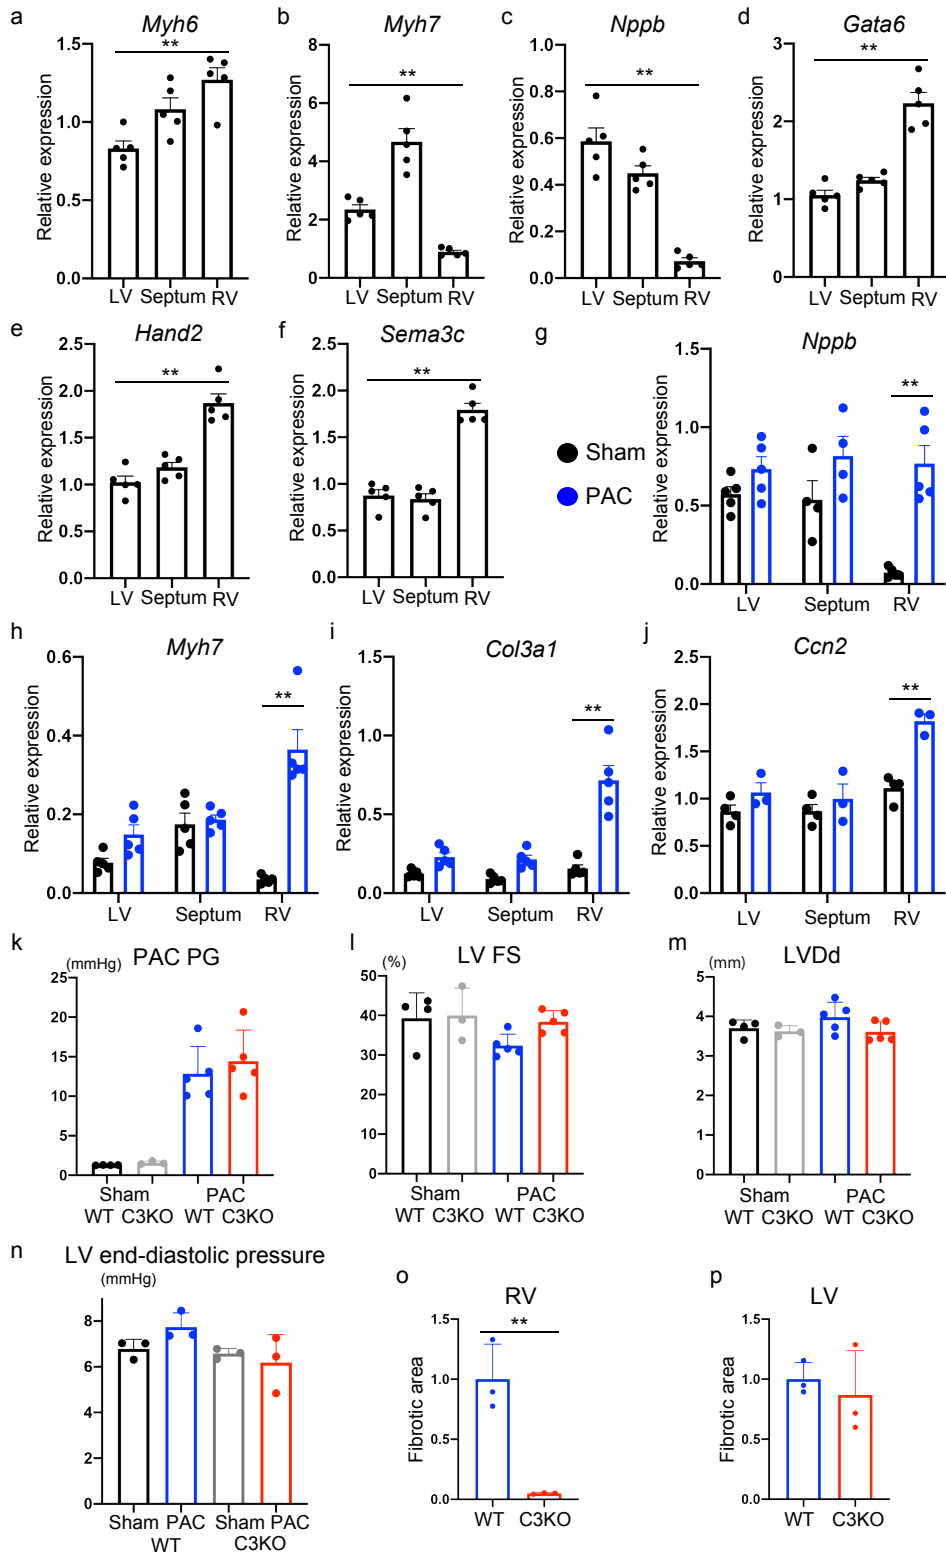

**Supplementary Fig. 1: Differential gene expression patterns among different cardiac regions.**

**a-f,** Gene expression of several cardiac markers, including *Myh6*, *Myh7*, *Nppb*, *Gata6*, *Hand2*, and *Sema3c*, were measured by qRT-PCR analysis in the left ventricle (LV), ventricular septum, and right ventricle (RV) of wild type (WT) mice (n = 5, p = 0.0029, p < 0.0001, p < 0.0001, p < 0.0001, p = 0.0002, p = 0.0018). Data are presented as mean ± standard error of the mean (SEM). **g-j,** Gene expression of several heart failure (*Nppb* and *Myh7*) and fibrotic (*Col3a1* and *Ccn2*) markers were measured by qRT-PCR analysis in the LV, ventricular septum and RV after pulmonary artery constriction (PAC) (n = 5, p = 0.0003, p = 0.0002, p = 0.0004, p = 0.001). Data are presented as mean ± SEM. In qRT-PCR analysis, expression of target genes was normalised to that of *Gapdh*. **k-m,** Measured values obtained from the echocardiogram in sham and PAC models of WT and C3 knockout (C3KO) mice. The pressure gradient in PAC site (PAC PG), LV contractile function (left ventricular fractional shortening [LV FS]), and LV size (left ventricular end-diastolic diameter [LVDd]) were evaluated (n = 3-5). Data are presented as mean ± standard deviation. **n,** Measured values obtained from the catheter analysis in sham and PAC models of WT and C3KO mice (n = 3). LV end-diastolic pressure was evaluated. Data are presented as mean ± SD. **o-p,** Quantified fibrotic area of the RV and LV in WT and C3KO PAC model mice (n = 3, p = 0.0049). Data are presented as mean ± SD. Significance was assessed using a two-tailed unpaired Student's *t*-test. \*p < 0.05; \*\*p < 0.01.

Supplementary Figure 2

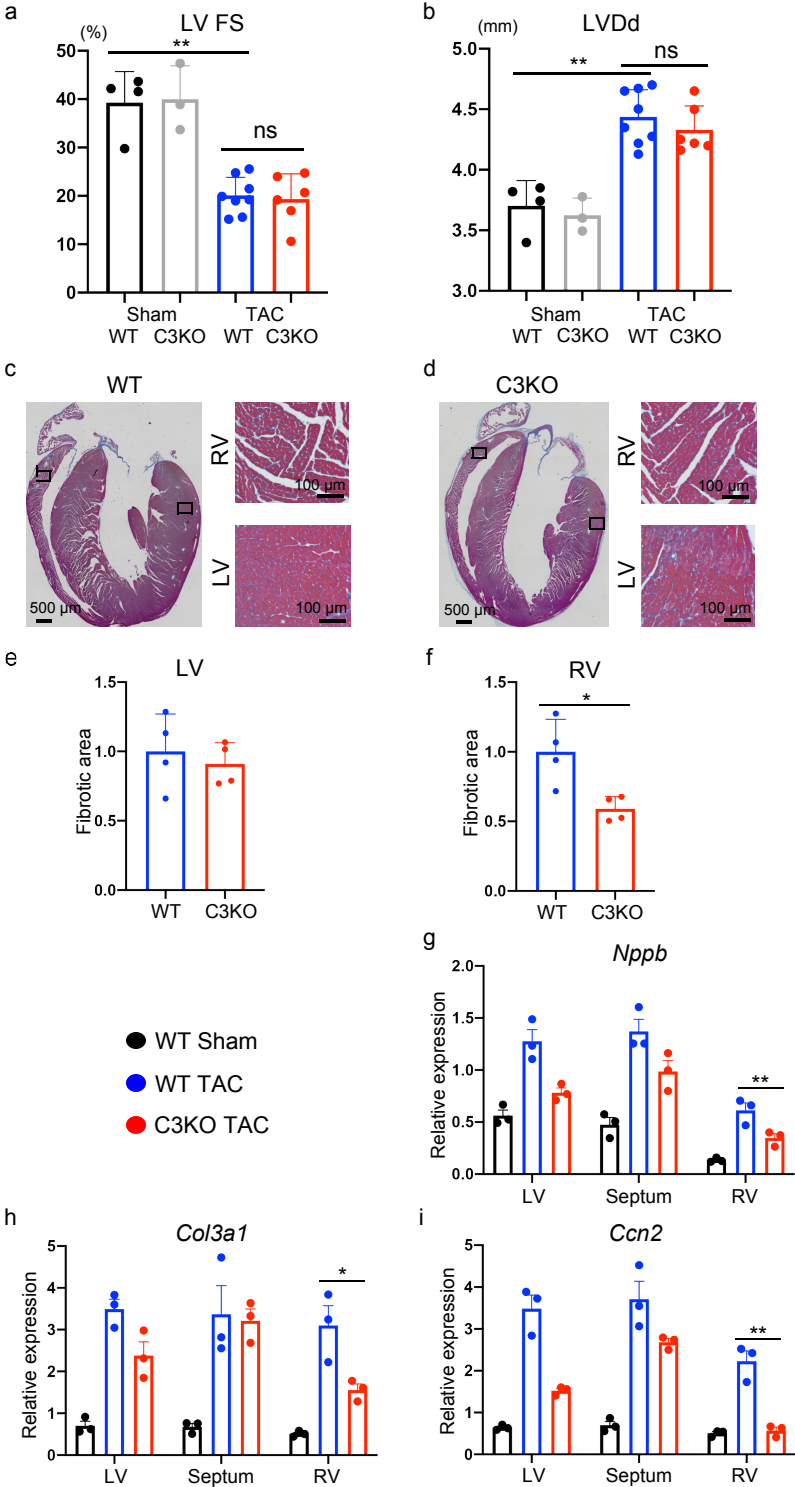

**Supplementary Fig. 2: C3 deficiency does not affect left ventricular (LV) functioning in transverse aortic constriction (TAC) mouse model.**

**a-b**, Measured values obtained from the echocardiogram of sham and TAC models in wild type (WT) and C3 knockout (C3KO) mice (n = 4, 3, 8, 6, a; p < 0.0001, p = 0.762, b; p = 0.003, p = 0.370). The LV contractile function (left ventricular fractional shortening [LV FS]) and LV size (left ventricular end-diastolic diameter [LVDD]) were evaluated. Data are presented as mean  $\pm$  standard error of the mean (SEM). **c-d**, Representative images of Azan staining of the heart in WT TAC and C3KO TAC mice (n = 4). RV, right ventricle. **e, f**, Quantified fibrotic area of the LV and RV in WT TAC and C3KO TAC mice (n = 4, p = 0.0169). Data are presented as mean  $\pm$  SEM. **g-i**, Gene expression of several heart failure (*Nppb*) and fibrotic markers (*Col3a1* and *Ccn2*) markers were measured by qRT-PCR analysis in the LV, ventricular septum, and RV of WT sham, WT TAC, and C3KO TAC mice (n = 3, p = 0.008, p = 0.035, p = 0.003). Data are presented as mean  $\pm$  SEM. In qRT-PCR analysis, expression of target genes was normalised to that of *Gapdh*. Significance was assessed using a two-tailed unpaired Student's *t*-test. \*p < 0.05; \*\*p < 0.01; ns, non-significant.

Supplementary Figure 3

a

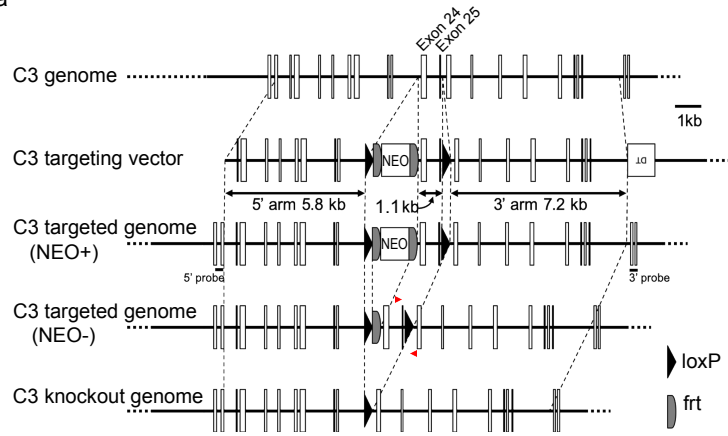

b

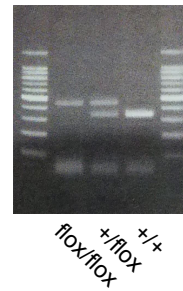

c

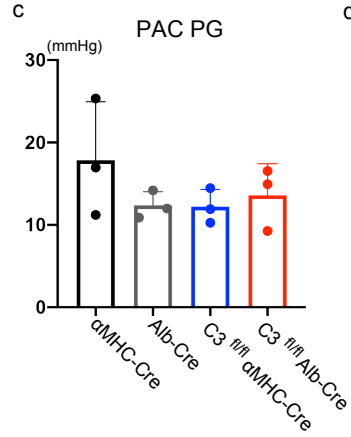

d

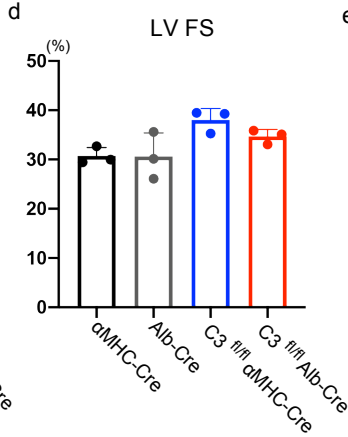

e

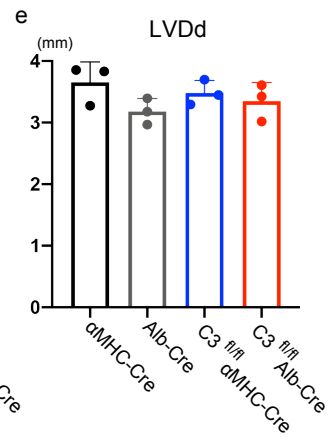

f

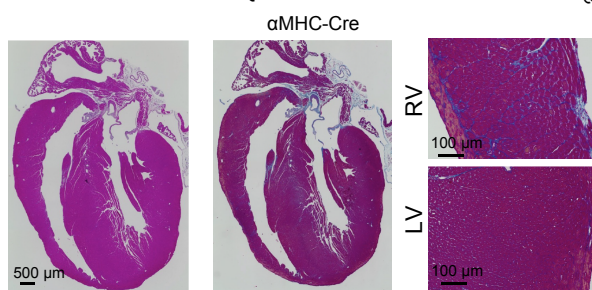

h

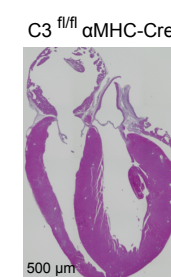

g

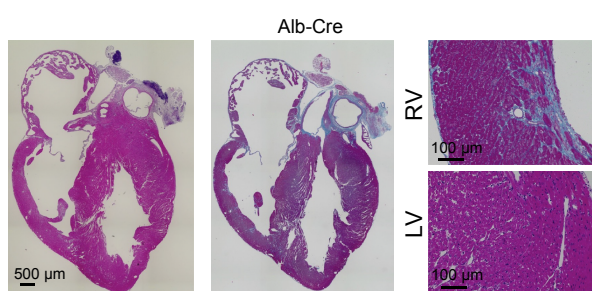

i

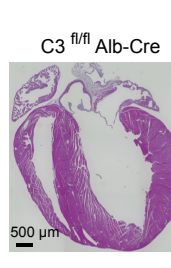

**Supplementary Fig. 3: Generation of conditional C3 knockout mice.**

**a**, Schematic illustration of the *C3* genomic DNA, targeting vector, targeted genome, targeted genome after FLP-mediated recombination, and knockout genome after Cre-mediated recombination. Open boxes indicate exons. Two *frt* sequences (grey semicircles) were attached to remove the neomycin resistance gene (*Neo*). The black triangles indicate the *loxP* sequences. The red arrowheads indicate the primer used for genotyping. **b**, Genotyping PCR for the detection of *C3* flox/flox, +/-flox, or +/+ mice (n = 3). **c-e**, Measured values obtained from the echocardiogram in  $\alpha$ -myosin heavy chain promoter-driven Cre ( $\alpha$ MHC-Cre) pulmonary artery constriction (PAC), and albumin promoter-driven Cre (Alb-Cre) PAC, *C3* floxed  $\alpha$ MHC-Cre ( $C3^{fl/fl}$   $\alpha$ MHC-Cre), and *C3* floxed Alb-Cre ( $C3^{fl/fl}$  Alb-Cre) PAC mice (n = 3). The pressure gradient in PAC site (PAC PG), left ventricle (LV) contractile function (left ventricular fractional shortening [LV FS]), and LV size (left ventricular end-diastolic diameter [LVDD]) were evaluated. Data are presented as mean  $\pm$  standard deviation. **f-g**, Representative images of hematoxylin-eosin staining and Azan staining of the heart in  $\alpha$ MHC-Cre and Alb-Cre PAC model mice (n = 3). **h-i**, Representative images of hematoxylin-eosin staining of the heart in  $C3^{fl/fl}$   $\alpha$ MHC-Cre and  $C3^{fl/fl}$  Alb-Cre PAC model mice (n = 3).

Supplementary Figure 4

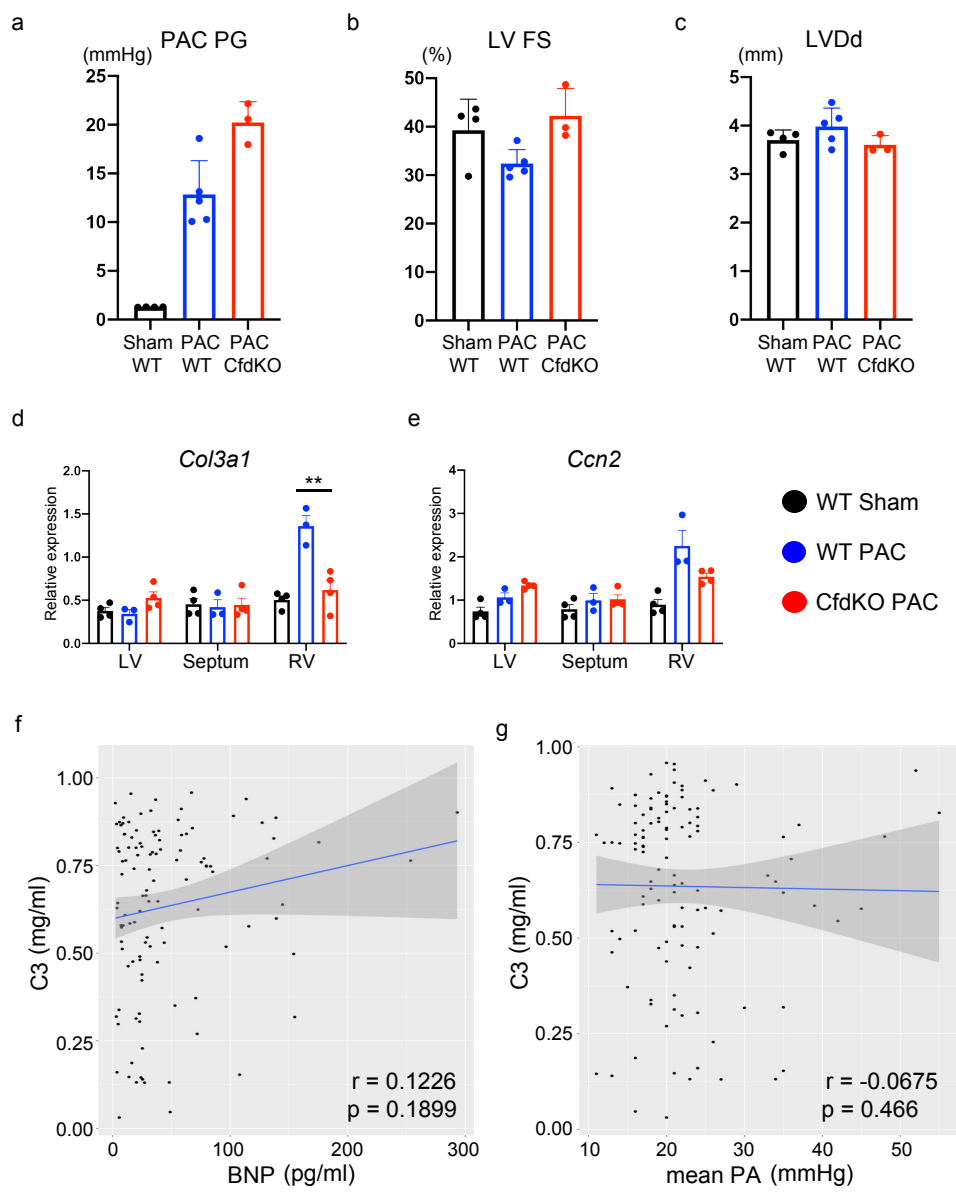



**Supplementary Fig. 4: Complement factor D (Cfd) plays an important role in right ventricular (RV) failure.**

**a-c**, Measured values obtained from the echocardiogram of wild type (WT) sham, WT pulmonary artery constriction (PAC), and *Cfd* knockout (CfdKO) PAC model mice (n = 4, 5, 3). The pressure gradient in PAC site (PAC PG), left ventricle (LV) contractile function (left ventricular fractional shortening [LV FS]), and LV size (left ventricular end-diastolic diameter [LVDD]) were evaluated. Data are presented as mean  $\pm$  standard deviation. **d-e**, Gene expression of fibrotic (*Col3a1* and *Ccn2*) markers were measured by qRT-PCR analysis in the LV, ventricular septum, and RV of WT sham, WT PAC, and CfdKO PAC mice (n = 4, 3, 4, d; p = 0.007). Data are presented as mean  $\pm$  standard error of the mean. In qRT-PCR analysis, expression of target genes was normalised to that of *Gapdh*. Significance was assessed using a two-tailed unpaired Student's *t*-test. \*p < 0.05. **f**, Scatter plots showing the correlation between the C3 concentration and B-type natriuretic peptide (BNP) concentration in the overall cohort (n = 116; mean age = 66.7  $\pm$  15.3 years; 70.7% women). Spearman correlation coefficient and two-tailed p-value are shown. Linear regression line (blue line) with 95% confidence intervals (gray area) is represented. **g**, Scatter plots showing the correlation between the C3 concentration and mean pulmonary artery (PA) pressure in the overall cohort (n = 119; mean age = 66.3  $\pm$  15.5 years; 71.4% women). Spearman correlation coefficient and two-tailed p-value are shown. Linear regression line with 95% confidence intervals is represented.

## Supplementary Figure 5

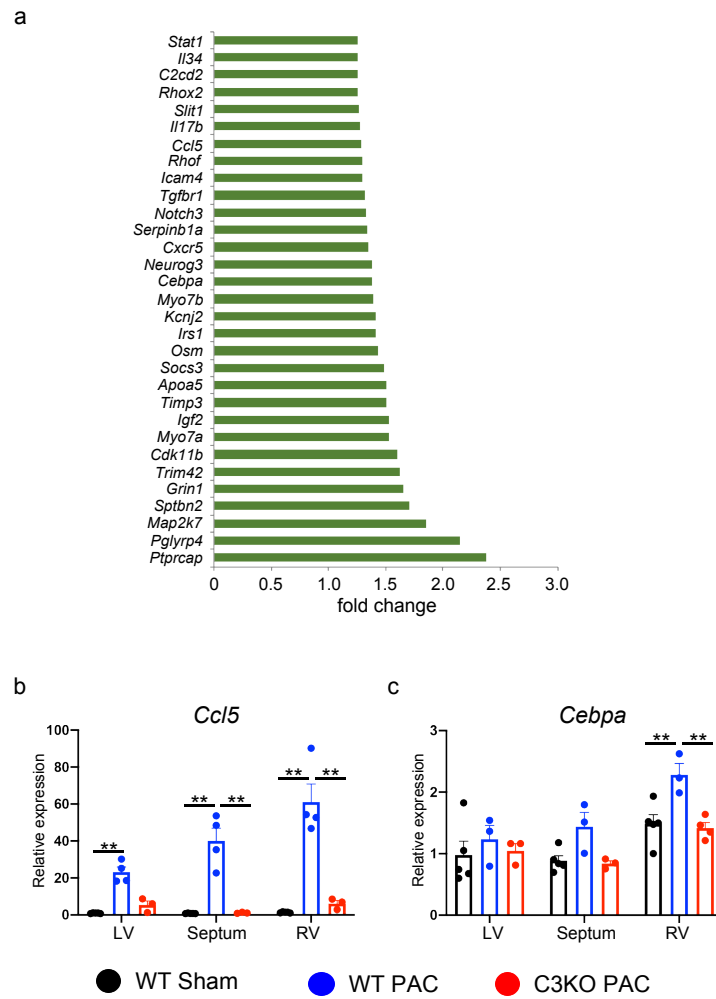

**Supplementary Fig. 5: Regulation of heart failure-specific gene expression by C3a *in vitro* and *in vivo*.**

**a**, Upregulated genes identified by global gene expression analysis of neonatal rat ventricular cardiomyocytes (NRVCs) by addition of recombinant C3a protein. **b-c**, Expression of genes upregulated *in vitro* (*Ccl5* and *Cebpa*) was measured by qRT-PCR analysis in the left ventricle (LV) ventricular septum, and right ventricle (RV) of wild type (WT) sham, WT pulmonary artery constriction (PAC), and C3 knockout (C3KO) PAC model mice (n = 3-5, b; p < 0.0001, p = 0.0003, p = 0.0051, p = 0.0002, p = 0.0055, c; p = 0.0017, p = 0.0029). Data are presented as mean ± standard error of the mean. In qRT-PCR analysis, expression of target genes was normalised to that of *Gapdh*. Significance was assessed using a two-tailed unpaired Student's *t*-test. \*\*p < 0.01.

Supplementary Figure 6

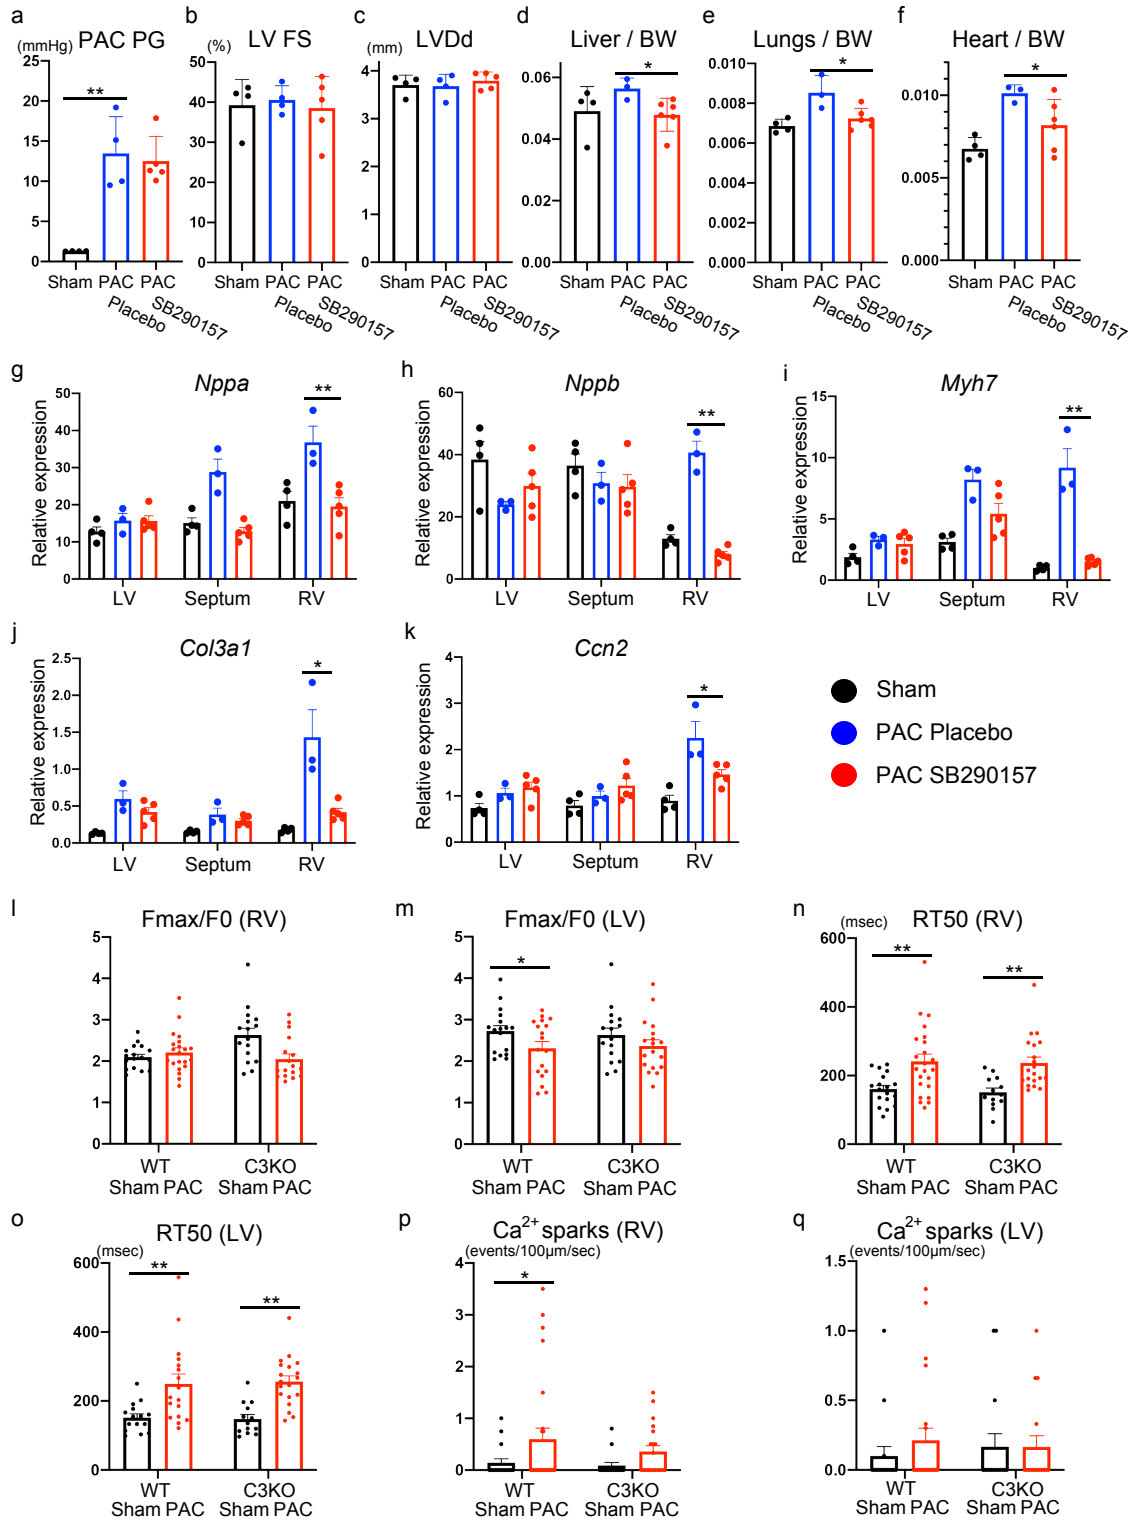

**Supplementary Fig. 6: C3a receptor (C3aR) antagonist SB290157 improves right ventricular (RV) functioning after pulmonary artery constriction (PAC).**

**a-c**, Measured values obtained from the echocardiogram in wild type (WT) sham mice, WT PAC mice under placebo, and WT PAC mice treated with SB290157 (n = 4, 4, 5, a; p = 0.0018). The pressure gradient in PAC site (PAC PG), left ventricle (LV) contractile function (left ventricular fractional shortening [LV FS]), and LV size (left ventricular end-diastolic diameter [LVDD]) were evaluated. Data are presented as mean  $\pm$  standard deviation. **d-f**, Organ weight/body weight (BW) ratios in WT sham mice, WT PAC mice under placebo, and WT PAC mice treated with SB290157 (n = 4, 3, 5, d; p = 0.0440, e; p = 0.0212, f; p = 0.0143). Data are presented as mean  $\pm$  standard error of the mean (SEM). **g-k**, Gene expression of several heart failure (*Nppa*, *Nppb*, and *Myh7*) and fibrotic (*Col3a1* and *Ccn2*) markers were measured by qRT-PCR analysis in the LV, ventricular septum, and RV of WT sham mice, WT PAC mice under placebo, and WT PAC mice treated with SB290157 (n = 5, 3, 5, p = 0.008, p < 0.001, p = 0.005, p = 0.011, p = 0.03). Data are presented as mean  $\pm$  SEM. In qRT-PCR analysis, expression of target genes was normalised to that of *Gapdh*. **l-q**, Measured values obtained from Ca<sup>2+</sup> transients in singled cardiomyocytes from RV and LV of sham and PAC models of WT and C3KO mice (n = 16, 15, 26, 20, m; p = 0.028, n; p = 0.001, p = 0.001, o; p = 0.002, p < 0.0001, p; p = 0.027). Fmax/F0, RT50, and Ca<sup>2+</sup> spark frequency were evaluated. Data are presented as mean  $\pm$  standard error of the mean. Significance was assessed using a two-tailed unpaired Student's *t*-test. \*p < 0.05; \*\*p < 0.01.

**Table. S1| Primers for genotyping by PCR**

|                         |                                                                                                                                                                                                        |
|-------------------------|--------------------------------------------------------------------------------------------------------------------------------------------------------------------------------------------------------|
| C3KO                    | oIMR 1355: ATC TTG AGT GCA CCA AGC C<br>oIMR 1356: GGT TGC AGC AGT CTA TGA AGG<br>oIMR 7415: GCC AGA GGC CAC TTG TGT AG<br>Mutant = ~500 bp<br>Heterozygote = ~500 bp and 350 bp<br>Wild type = 350 bp |
| C3 <sup>flox/flox</sup> | C3 <sup>flox</sup> -F           CTCGTCCCACCTCACATAGA<br>C3 <sup>flox</sup> -R           GCCGCATAAAGCTGGTGCTT<br>WT: 341bp, floxed: 448bp                                                               |
| Cfd KO                  | F: ATGGGGTGGAGGGTGTACT<br>R: ACAACAGTCCTGGGTACAGC<br>WT: ~2000bp, KO: 600bp                                                                                                                            |

**Table. S2| Primers for qRT-PCR**

Mouse

|               |                                                        |
|---------------|--------------------------------------------------------|
| <i>Gapdh</i>  | F: CCAATGTGTCCGTCGTGGATCT<br>R: GTTGAAGTCGCAGGAGACAACC |
| <i>C3</i>     | F: GAGCGAAGAGACCATCGTACT<br>R: TCTTTAGGAAGTCTTGCACAGTG |
| <i>C3ar1</i>  | F: CTCACTTGTCTATTGGGACTGC<br>R: ATGGAGGAACCAGACTGTGTT  |
| <i>Cfd</i>    | F: CTACAAGCGATGGTATGATGTGC<br>R: GGACCCAACGAGGCATTCT   |
| <i>Nppa</i>   | F: CACAGATCTGATGGATTTCAAGA<br>R: CCTCATCTTCTACCGGCATC  |
| <i>Nppb</i>   | F: AGTCCTTCGGTCTCAAGGCA<br>R: CCGATCCGGTCTATCTTGTGC    |
| <i>Col3a1</i> | F: CCTGGCTCAAATGGCTCAC<br>R: CAGGACTGCCGTTATTCCCG      |
| <i>Ccn2</i>   | F: GGGCCTCTTCTGCGATTTTC<br>R: ATCCAGGCAAGTGCATTGGTA    |
| <i>Myh6</i>   | F: GCAGAACAGTAAAATTGAGGACG<br>R: CGCAGCTTCTCCACCTTAG   |
| <i>Myh7</i>   | F: GCCCTTTGACCTCAAGAAAG<br>R: CTTACAGTCACCGTCTTGC      |
| <i>Ccl5</i>   | F: TGCTCCAATCTTGCAGTCGT<br>R: TCTTCTCTGGGTTGGCACAC     |
| <i>Cebpa</i>  | F: CAAGAACAGCAACGAGTACCG<br>R: GTCACTGGTCAACTCCAGCAC   |
| <i>Hand2</i>  | F: GCAGGACTCAGAGCATCAACA<br>R: AGGTAGGCGATGTATCTGGTG   |
| <i>Sema3c</i> | F: GCCAGCATCAACAATCAAAGTT<br>R: TCTGAATCACCCGGACGAAAT  |
| <i>Gata6</i>  | F: CATCACCATCACCCGACCTAC<br>R: GGCCCTGTAAGCTGTGGAG     |

Human

|              |                                                      |
|--------------|------------------------------------------------------|
| <i>GAPDH</i> | F: ACAACTTTGGTATCGTGGAAGG<br>R: GCCATCACGCCACAGTTTC  |
| <i>C3</i>    | F: CTGTCCACGACTTCCCAGG<br>R: CCCCTTTTCTGACTTGA ACTCC |
| <i>CFD</i>   | F: GACACCATCGACCACGACC<br>R: GCCACGTCGCAGAGAGTTC     |
| <i>C3ARI</i> | F: CCCTACGGCAGGTTCTATG<br>R: GACAGCGATCCAGGCTAATGG   |



**Table. S3| Lists of antibodies**

| <b>Reagent</b>                  | <b>Source</b>             | <b>Identifier</b> |
|---------------------------------|---------------------------|-------------------|
| Mouse anti-C3d                  | Creative BioLabs          | TAB-1360CL        |
| Rabbit anti-p44/42 MAPK         | Cell Signaling technology | 4695              |
| Rabbit anti-Phospho-p44/42 MAPK | Cell Signaling technology | 4370              |
| Rabbit anti-Phospho-p38         | Cell Signaling technology | 9211              |
| Rabbit anti-p38                 | Cell Signaling technology | 9212              |
| Rabbit anti-SAPK/JNK            | Cell Signaling technology | 9252              |
| Rabbit anti-phospho-SAPK/JNK    | Cell Signaling technology | 9251              |

**Table. S4| Lists of chemicals, recombinant proteins, and siRNA**

| <b>Reagent</b>                             | <b>Source</b> | <b>Identifier</b>   |
|--------------------------------------------|---------------|---------------------|
| Recombinant Mouse Complement Component C3a | R&D Systems   | 8085-C3-025         |
| SB290157                                   | Sigma Aldrich | SML1192-25MG        |
| Endthelin 1                                | Sigma Aldrich | E7764-1MG           |
| C3aR1 siRNA                                | Ambion        | s136363 Cat:4390771 |
